# Supplementary material for: Dramatic increases in blood glutamate concentrations are closely related to traumatic brain injury-induced acute lung injury
Source: PubMed Central journal article supplement (PMC5511144; doi:10.1038/s41598-017-05574-9), 2017-07-14
Supplement: 41598_2017_5574_MOESM1_ESM.pdf [file 41598_2017_5574_MOESM1_ESM.pdf]

## **Supplementary Materials**

**Dramatic increases in blood glutamate concentrations are closely related to traumatic brain injury-induced acute lung injury**

### **Authors:**

Wei Bai<sup>#</sup>; Wan-Li Zhu<sup>#</sup>; Ya-Lei Ning; Ping Li; Yan Zhao; Nan Yang; Xing Chen;

Yu-Lin Jiang; Wen-Qun Yang; Dong-Po Jiang; Li-Yong Chen\* and Yuan-Guo Zhou\*

# Drs. Bai and Zhu contributed equally to this work.

\* For information regarding this article, please address correspondence to Dr. Zhou, MD, PhD (E-mail: zhourick@hotmail.com; ygzhou@tmmu.edu.cn) or Dr. Chen, MD, PhD (E-mail: mzkcly@aliyun.com).

**Table S1. Detailed Information on Injuries and Treatments in Patients with TBI (N=50)**

| <b>Variables</b>                 | <b>N (%)</b> |
|----------------------------------|--------------|
| <b>Intracranial lesion</b>       |              |
| Epidural haematoma               | 5 (10.0)     |
| Subdural haematoma               | 18 (36.0)    |
| Traumatic SAH                    | 18 (36.0)    |
| Intraparenchymal lesion          | 36 (72.0)    |
| Skull fracture                   | 20 (40.0)    |
| <b>Marshall initial CT score</b> |              |
| Marshall I - II                  | 22 (44.0)    |
| Marshall III-IV                  | 16 (32.0)    |
| Marshall V -VI                   | 12 (24.0)    |
| <b>GCS score at admission</b>    |              |
| 13-15                            | 24 (48.0)    |
| 8-12                             | 11 (22.0)    |
| 3-7                              | 15 (30.0)    |
| <b>Extracranial lesion</b>       |              |
| Abdominal injury                 | 5 (10.0)     |
| Multiple fracture                | 6 (12.0)     |
| Other injuries                   | 4 (0.08)     |
| <b>Neurosurgical procedures</b>  |              |
| None                             | 6 (12.0)     |
| Craniotomy                       | 18 (36.0)    |
| Decompressive craniectomy        | 26 (52.0)    |

GCS, Glasgow Coma Scale; SAH, subarachnoid haemorrhage; TBI, traumatic brain injury.

**Table S2. Detailed Information on Injuries and Treatments in Patients with MPT**  
(N=42)

| <b>Variables</b>            | <b>N (%)</b> |
|-----------------------------|--------------|
| <b>Peripheral lesion</b>    |              |
| Abdominal injury            | 14 (33.3)    |
| Multiple fracture           | 28 (66.7)    |
| Other injuries              | 12 (28.6)    |
| <b>AIS-ISS at admission</b> |              |
| <16                         | 10 (23.8)    |
| 16-25                       | 18 (42.9)    |
| >25                         | 14 (33.3)    |
| <b>Treatment</b>            |              |
| General treatment           | 14 (33.3)    |
| Closed thoracic drainage    | 10 (23.8)    |
| Reduction and fixation      | 28 (66.7)    |

AIS-ISS, Abbreviated Injury Scale-Injury Severity Score; MPT, multiple peripheral trauma.

**Table S3. Comparison of Renal and Liver Function Between Patients with TBI and those with MPT**

| <b>Variables (Units)</b> | <b>TBI</b>          | <b>MPT</b>           | <b><i>p</i></b> |
|--------------------------|---------------------|----------------------|-----------------|
| <b>Liver function</b>    |                     |                      |                 |
| AST (U/L)                | 29.90 (17.48-50.85) | 58.60 (27.90-66.90)  | 0.011           |
| ALT (U/L)                | 30.30 (17.40-46.80) | 42.90 (24.00-105.00) | 0.026           |
| Albumin (g/L)            | 41.60 (37.31-45.20) | 40.5 (38.23-47.01)   | 0.420           |
| <b>Renal function</b>    |                     |                      |                 |
| Creatinine (mg/L)        | 66.5 (53.28-78.25)  | 65.90 (46.78-84.93)  | 0.969           |
| BUN (g/L)                | 4.99 (3.67-6.70)    | 4.93 (3.77-6.80)     | 0.957           |

*p*, difference between the two groups as indicated by nonparametric Mann-Whitney U tests. ALT, alanine aminotransferase; AST, aspartate transaminase; BUN, blood urea nitrogen; MPT, multiple peripheral trauma; TBI, traumatic brain injury.

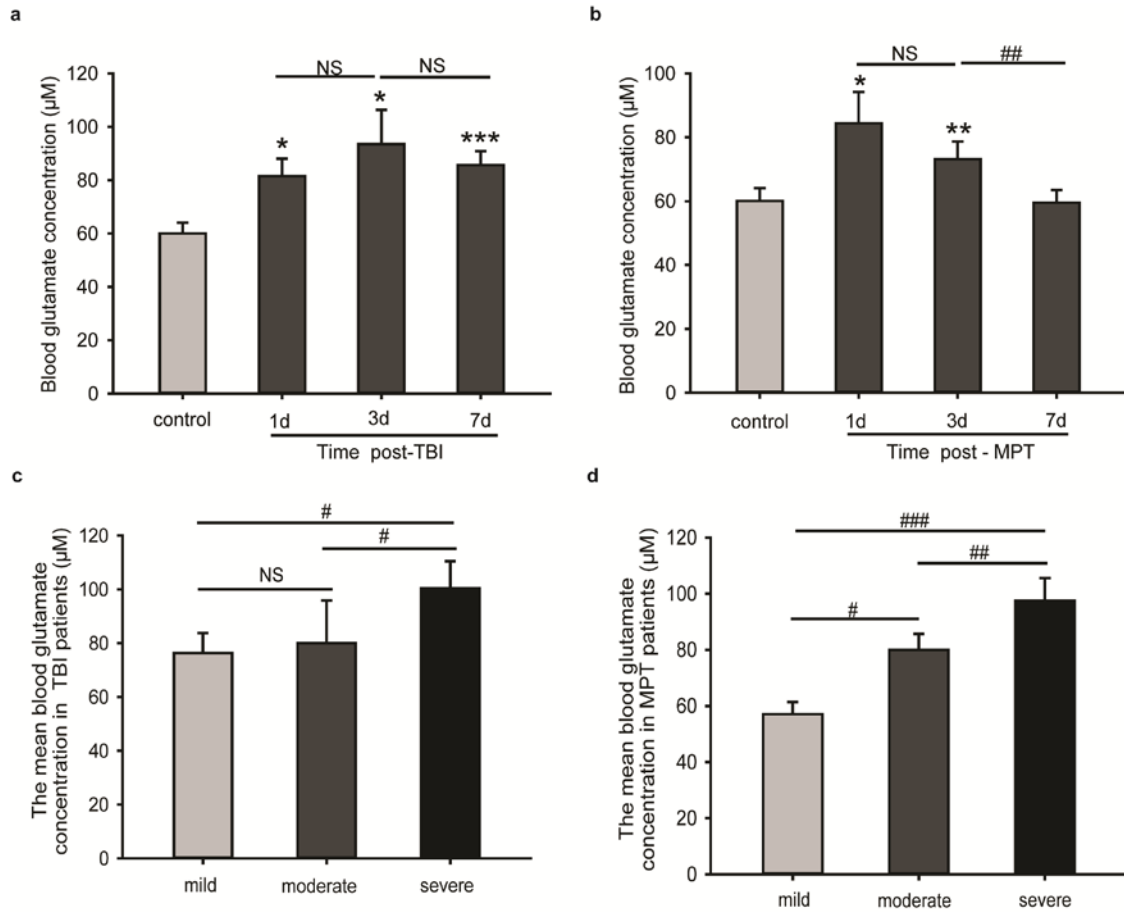

**Figure S1.** (a, b) Comparisons of blood glutamate concentrations on the 1<sup>st</sup>, 3<sup>rd</sup> and 7<sup>th</sup> day after injury in patients with TBI or MPT. (c, d) Comparisons of mean blood glutamate concentrations in patients with different severities of TBI or MPT. \* $p < 0.05$ , \*\* $p < 0.01$ , and \*\*\* $p < 0.001$  compared to the control group; # $p < 0.05$ , ## $p < 0.01$ , and ### $p < 0.001$  compared between the two groups; NS, not significant. Significance was determined by ANOVA with Tukey-Kramer *post hoc* tests or nonparametric Mann-Whitney U tests. MPT, multiple peripheral trauma; TBI, traumatic brain injury.

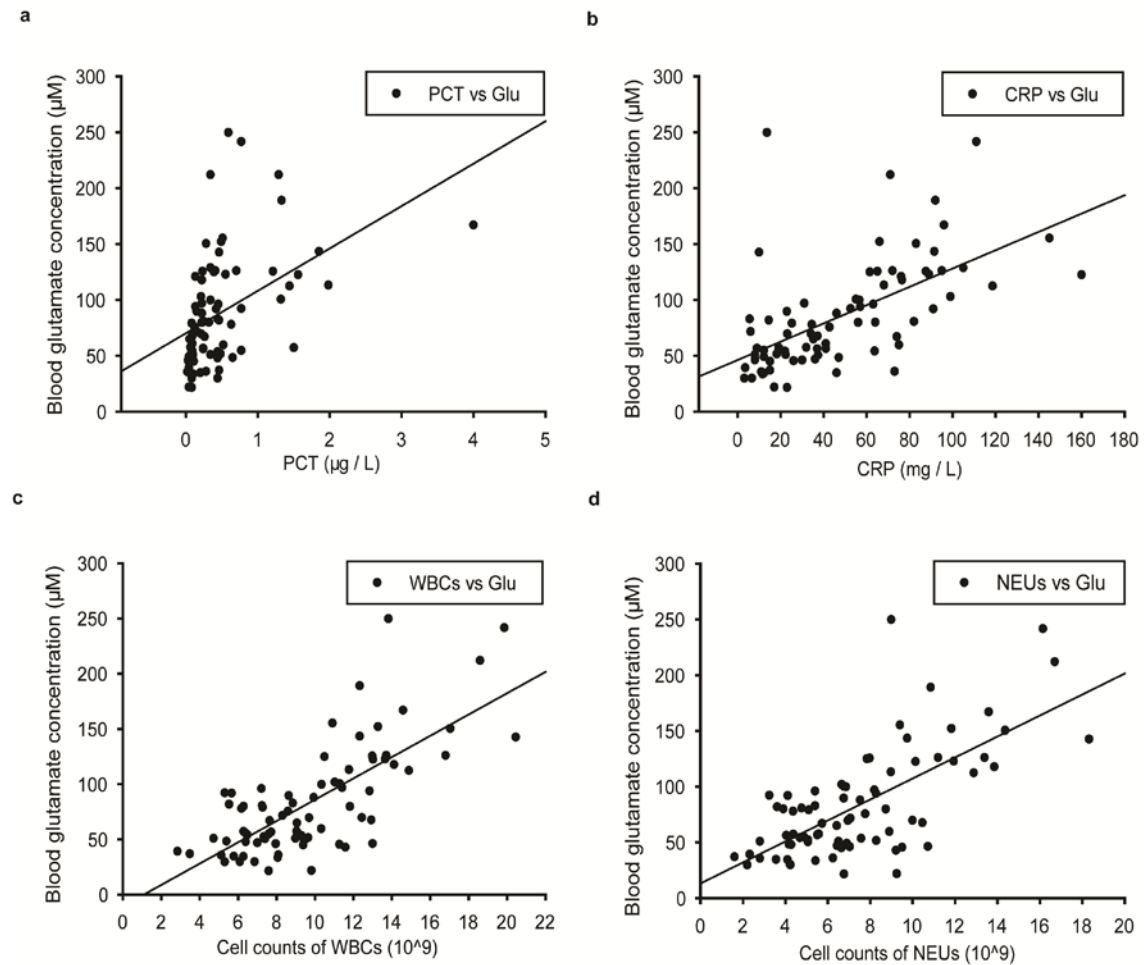

**Figure S2.** The Spearman's correlation test showed an obvious correlation between blood glutamate levels and inflammatory markers in patients with TBI-ALI ( $r=0.593$ ,  $0.670$ ,  $0.659$ ,  $0.596$  for PCT (a), CRP (b), WBCs (c) and NEUs (d), respectively;  $p=0.000$ ). CRP, C-reactive protein; NEUs, neutrophils; PCT, procalcitonin; WBCs, white blood cells.
